# Supplementary material
Source: publisher figshare collection journal article supplement (https://gsajournals.figshare.com/ndownloader/files/12367043)
Supplement: Supplementary file 1 [file 12367043]

**Table S3.** Kruskal-Wallis test results. G = German population; I = Israel population; A,B,C = Individual genotypes comprising each population; Size = Body length at maturity; AM = Age at maturity; Egg = Egg number at maturity; MaxV = Maximum velocity; MeanV = Mean velocity; SDV = Standard deviation of velocity; Non-Behavioral = Size, AM, Egg; Behavioral = MaxV, MeanV, SDV. ΔM = Mutational bias; AbsΔM = Absolute value of ΔM; SE = Standard error; χ2 = Chi-squared value; df = Degrees of freedom; p = Unadjusted p-value.

| Trait | Absolute Value of ΔM | SE | χ2 | df | p |
| --- | --- | --- | --- | --- | --- |
| Size | 0.001 | 0.000 | 9.21 | 5 | 0.101 |
| AM | 0.002 | 0.001 |  |  |  |
| Egg | 0.003 | 0.000 |  |  |  |
| MaxV | 0.015 | 0.007 |  |  |  |
| MeanV | 0.013 | 0.007 |  |  |  |
| SDV | 0.013 | 0.007 |  |  |  |
|  |  |  |  |  |  |
| Trait Type | Absolute Value of ΔM | SE | χ2 | df | p |
| Non-Behavioral | 0.002 | 0.000 | 4.44 | 1 | 0.035 |
| Behavioral | 0.014 | 0.004 |  |  |  |
|  |  |  |  |  |  |
| Genotype | ΔM | SE | χ2 | df | p |
| GA | -0.022 | 0.009 | 19.24 | 5 | 0.002 |
| GB | -0.014 | 0.006 |  |  |  |
| GC | 0.000 | 0.001 |  |  |  |
| IA | 0.005 | 0.002 |  |  |  |
| IB | 0.002 | 0.001 |  |  |  |
| IC | -0.001 | 0.001 |  |  |  |
|  |  |  |  |  |  |
| Population | ΔM | SE | χ2 | df | p |
| G | -0.012 | 0.004 | 10.41 | 1 | 0.001 |
| I | 0.002 | 0.004 |  |  |  |
